# Supplementary material for: Identifying Stable Reference Genes for qRT-PCR Normalisation in Gene Expression Studies of Narrow-Leafed Lupin (Lupinus angustifolius L.)
Source: PLoS One. 2016 Feb 12;11(2):e0148300. doi: 10.1371/journal.pone.0148300 (PMC4752343; doi:10.1371/journal.pone.0148300)
Supplement: S1 Table — (XLSX) [file pone.0148300.s001.xlsx]

## Sheet: S1 Supporting Information
S1 Table. Identification of transcripts in the narrow-leafed lupin Tanjil unigene assembly of Kamphuis et al. [34] using Medicago truncatula transcripts as queries.
Candidate reference gene	Medicago truncatula sequence used in BLASTn search a	Putative number of Lupinus angustifolius genes in gene family d	Lupinus angustifolius transcript with highest homology used for primer design	Length of full/partial transcript (bp)	E-score	Pairwise identity (%)	Bit score	Length of deduced full/partial aa sequence (aa)	Full length ORF? e	Pairwise identity for deduced aa sequences (%)
TUB	TC191797 b	29	comp613_c0_seq3	511	0	90	691.97	119	No [- 199 aa (N) & - 131 aa (C)]	98.3
HEL	CB892427	3	comp11345_c0_seq1	661	0	90.6	913.79	143	No [- 10 aa (C)]	92.3
PDF2	TC181279 c	4	comp7642_c0_seq1	445	4.77e-129	83	461.14	135	Yes	93.3
PPR	TC96273	6	comp39030_c0_seq1	507	3.33e-48	68.6	194.24	151	No [- 164 aa (N) & - 41 aa (C)]	53.6
PTB	TC111751	2	comp12954_co_seq1	540	4.88e-110	76.5	398.03	114	No [- 29 aa (C)]	78.1
UBC	AW686873	2	comp4884_c0_seq1	367	7.79e-133	88.6	473.77	70	No [- 85 aa (N)]	98.6
UPL7	TC111218	1	comp15438_c0_seq1	1271	0	88.7	1642.35	386	No [- 22 aa (C)]	93
a Medicago truncatula transcript sequence names provided by Kakar et al. [28].
b The original TC (TC106341) for TUB provided by Kakar et al. [28] had been altered to TC191797 when retrieving sequences from: compbio.dfci.harvard.edu/tgi/cgi-bin/tgi/gimain.pl?gudb=medicago/.
c The original TC (TC107161) for PDF2 provided by Kakar et al. [28] had been altered to TC181279 when retrieving sequences from: compbio.dfci.harvard.edu/tgi/cgi-bin/tgi/gimain.pl?gudb=medicago/.
d Minimum BLASTn p<1E-20.
e Where a full length Open Reading Frame (ORF) has not been observed, the number of amino acids (aa) missing from the narrow-leafed lupin deduced aa sequence (relative to Medicago truncatula) has been listed for the N and C termini.
